# Supplementary material for: Thermodynamic origin of α-helix stabilization by side-chain cross-links in a small protein
Source: Royal Society of Chemistry journal article supplement (doi:10.1039/c6ob00475j), 2016-01-01
Supplement: c6ob00475j1.pdf [file c6ob00475j1.pdf]

## Thermodynamic Origin of $\alpha$ -Helix Stabilization by Side-Chain Cross-Links in a Small Protein

Conor M. Haney, Halina M. Werner, James J. McKay and W. Seth Horne\*  
*Department of Chemistry, University of Pittsburgh, Pittsburgh, PA 15260*

### Supporting Information

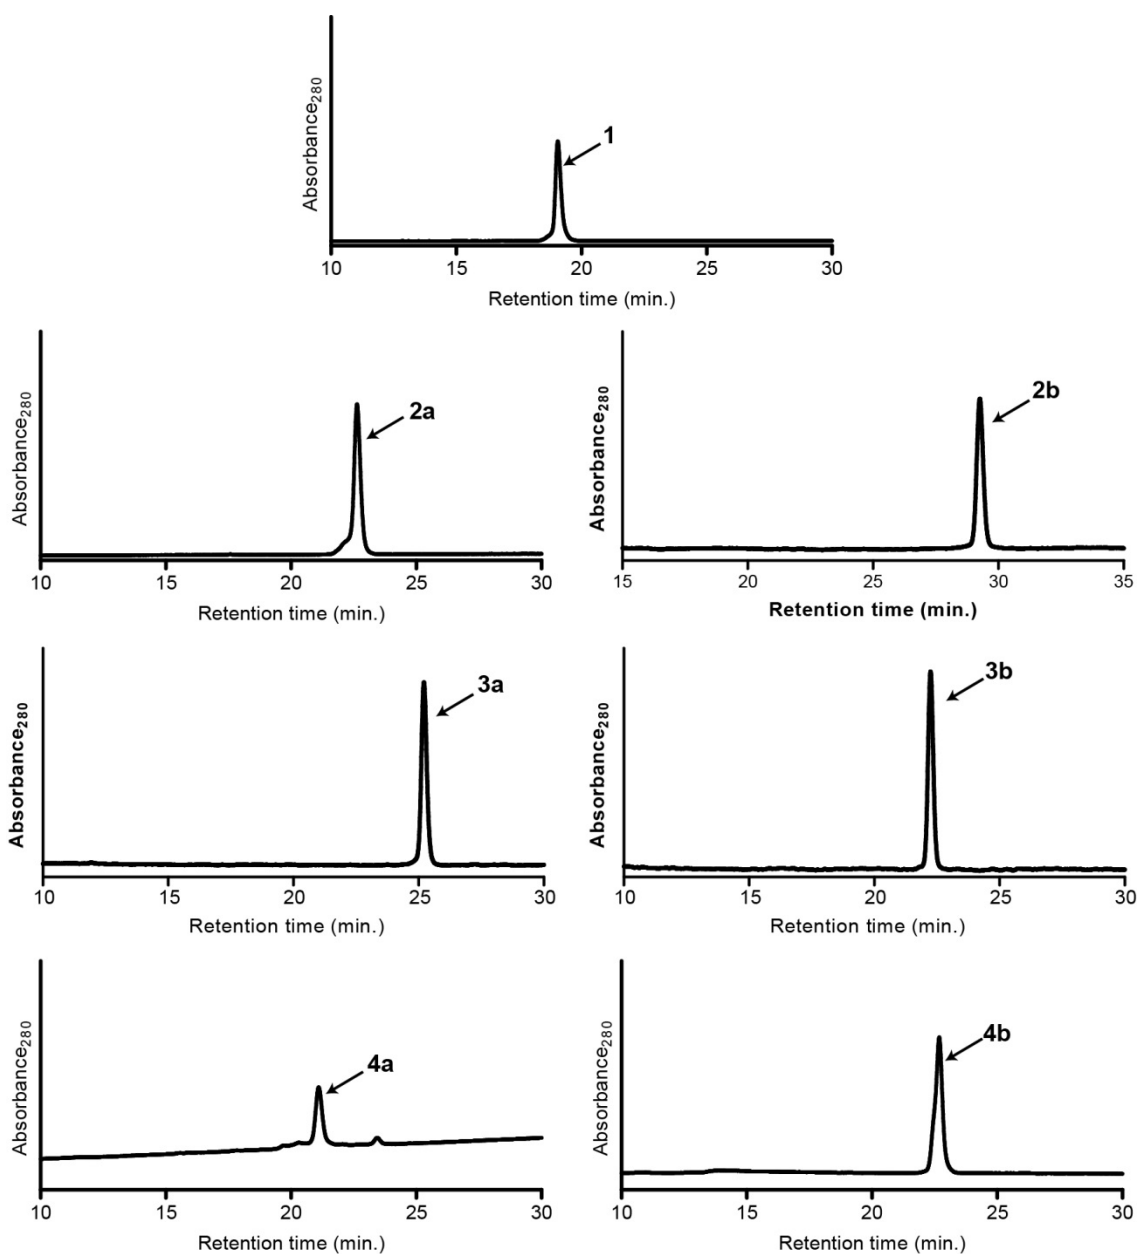

**Fig. S1.** Analytical HPLC chromatograms of purified peptides **1**, **2a-4a** and **2b-4b**.

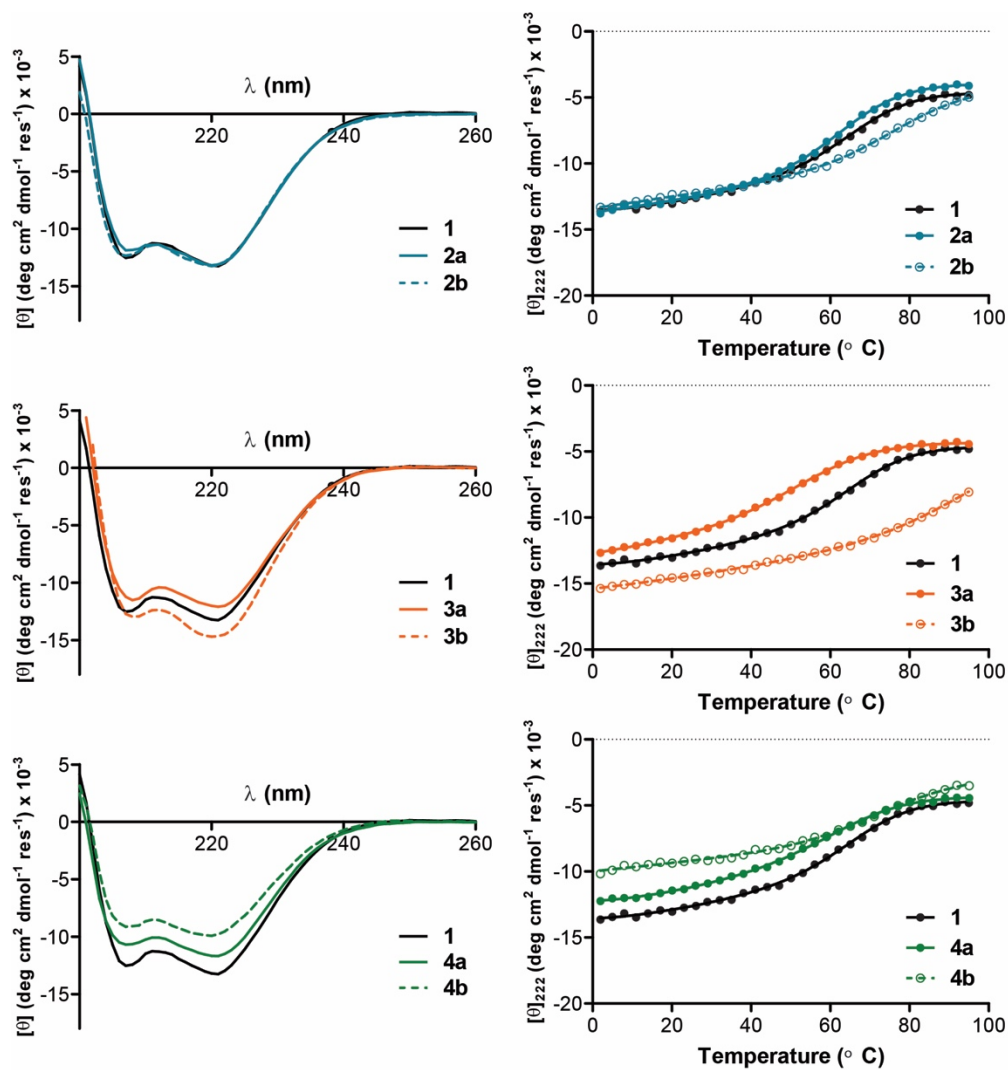

**Fig. S2.** Circular dichroism (CD) data for peptides **1**, **2a-4a** and **2b-4b** at 50  $\mu\text{M}$  concentration. Left: CD scans acquired at 20  $^{\circ}\text{C}$ . Right: CD thermal melts obtained by monitoring molar ellipticity at 222 nm as a function of temperature; circles represent measured ellipticity values, while dashed or solid lines represent the nonlinear fit to a two-state thermal denaturation model.

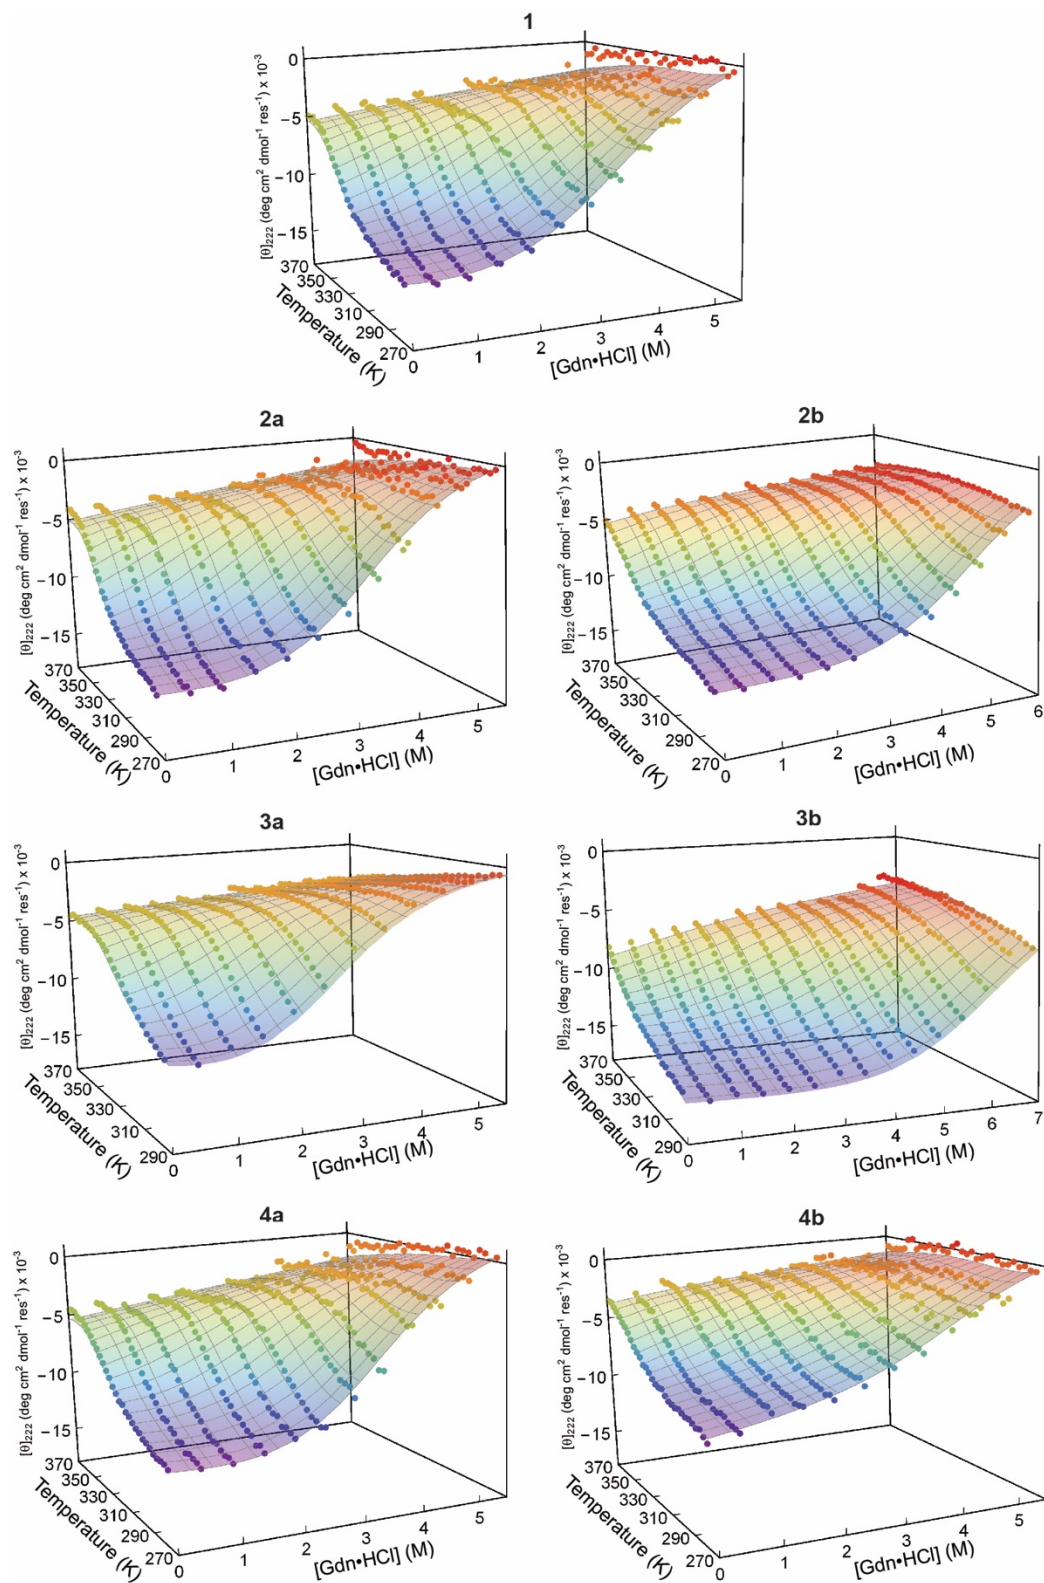

**Fig. S3.** Thermal-chemical denaturation plots for peptides **1**, **2a-4a** and **2b-4b**. Raw data (points) are fit (surface) to extract thermodynamic parameters for the folding equilibrium.

**Table S1.** MALDI-TOF data for peptides **1**, **2a-4a** and **2b-4b**.

| <b>Peptide</b> | <b>[M+H]<sup>+</sup> (<i>m/z</i>)</b> |                 |
|----------------|---------------------------------------|-----------------|
|                | <b>Calculated</b>                     | <b>Observed</b> |
| <b>1</b>       | 4151.3                                | 4151.1          |
| <b>2a</b>      | 4138.2                                | 4138.0          |
| <b>2b</b>      | 4120.2                                | 4120.3          |
| <b>3a</b>      | 4146.8                                | 4146.0          |
| <b>3b</b>      | 4146.8                                | 4146.5          |
| <b>4a</b>      | 4212.3                                | 4212.3          |
| <b>4b</b>      | 4163.2                                | 4163.0          |
